# Supplementary material for: Partial suppression of M1 microglia by Janus kinase 2 inhibitor does not protect against neurodegeneration in animal models of amyotrophic lateral sclerosis
Source: PubMed Central journal article supplement (PMC4213500; doi:10.1186/s12974-014-0179-2), 2014-10-19
Supplement: 12974_2014_179_MOESM3_ESM.pdf [file 12974_2014_179_MOESM3_ESM.pdf]

# Supplementary figure-2

## A

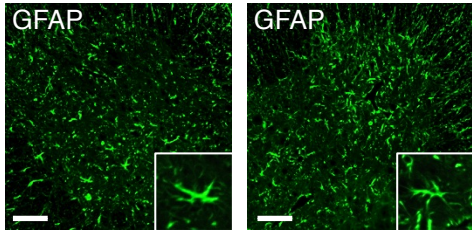

Vehicle-treated  
mSOD1<sup>G93A</sup> mice  
(120 days old)

R723-treated  
mSOD1<sup>G93A</sup> mice  
(120 days old)
